# Supplementary material for: Selective and Irreversible Inhibitors of Mosquito Acetylcholinesterases for Controlling Malaria and Other Mosquito-Borne Diseases
Source: PubMed Central journal article supplement (PMC2731169; doi:10.1371/journal.pone.0006851), 2009-08-28

**BPA11 before HPLC**

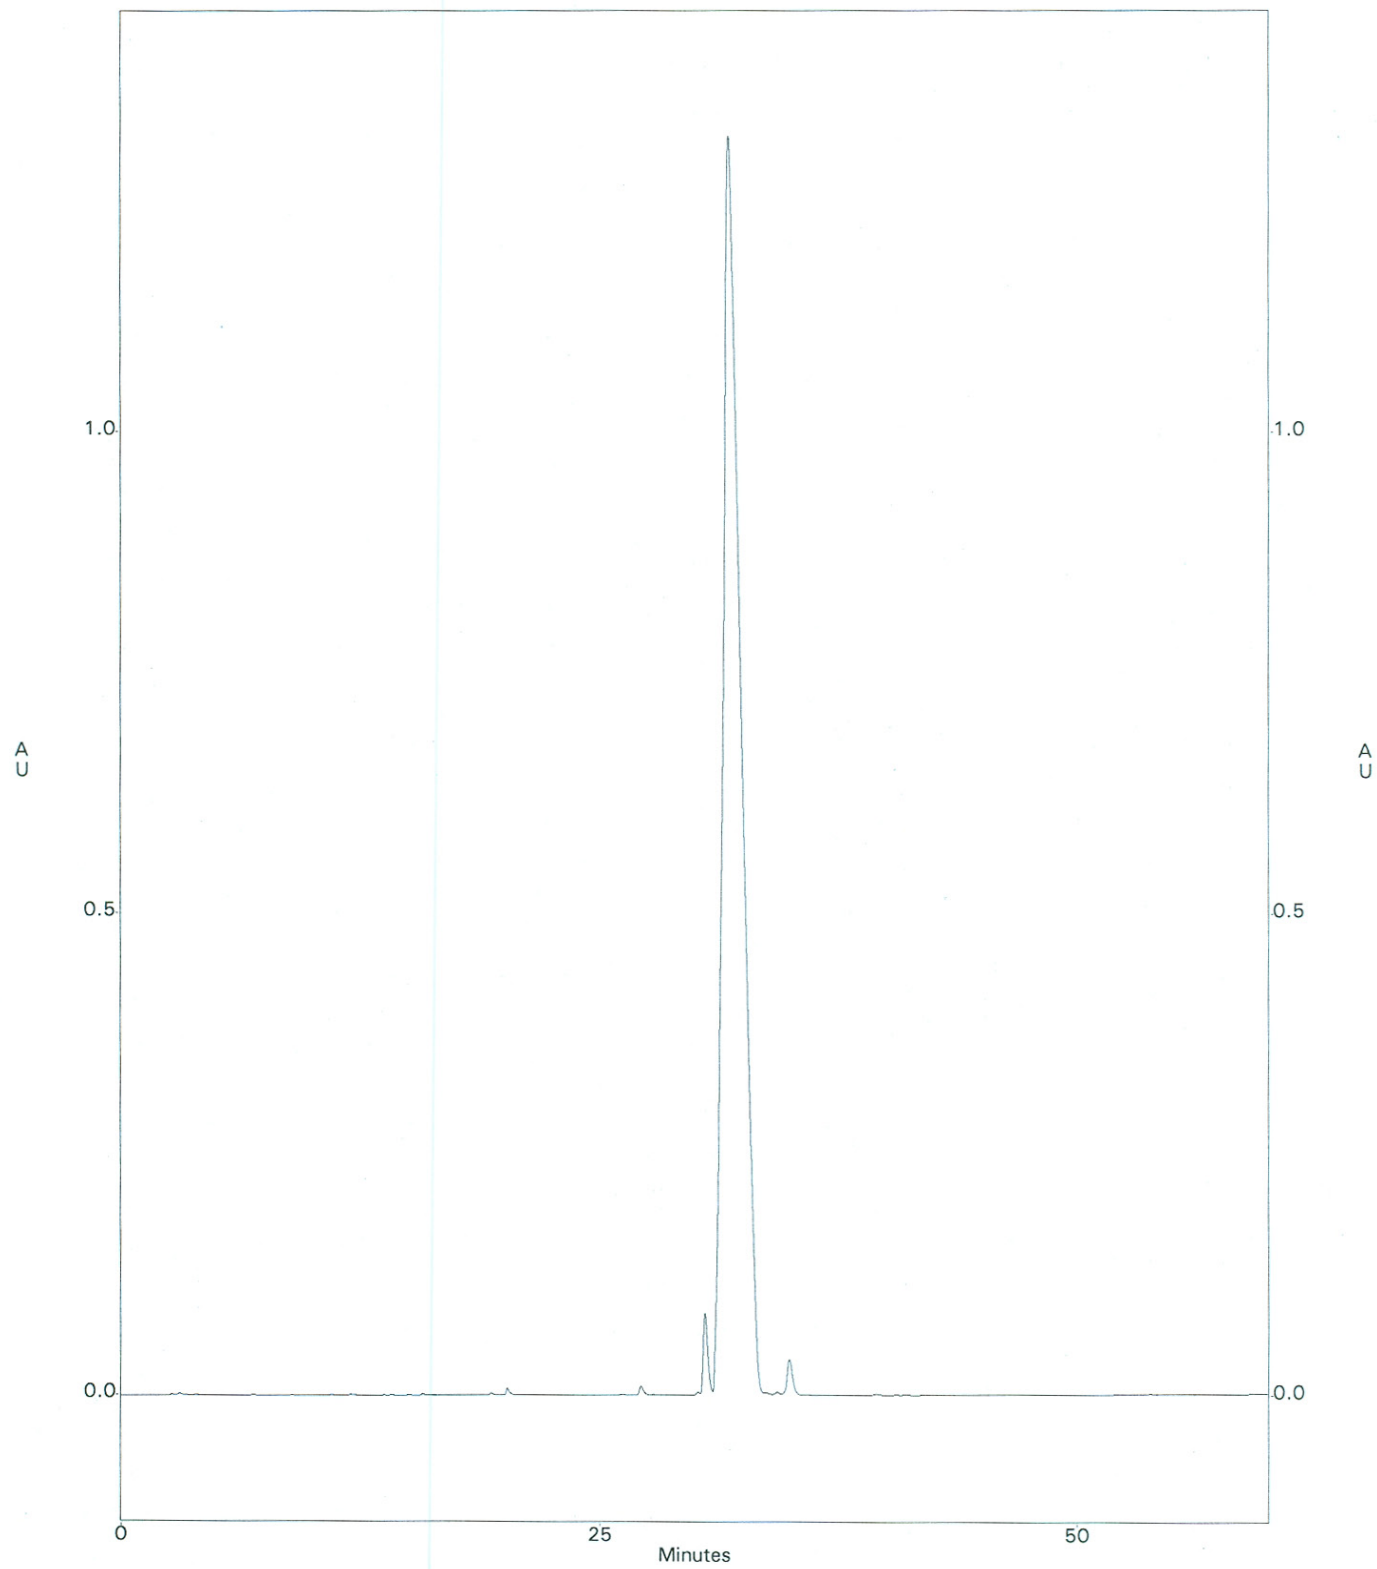

Supplement: pone.0006851.s003.pdf [file pone.0006851.s003.pdf]
